# Supplementary material
Source: PubMed Central journal article supplement (PMC8214342)
Supplement: NIHMS1547520-supplement-1.pdf [file NIHMS1547520-supplement-1.pdf]

**Cell Reports, Volume 29**

**Supplemental Information**

**Intra-V $\kappa$  Cluster Recombination**

**Shapes the Ig Kappa Locus Repertoire**

**Kenta Shinoda, Yaakov Maman, Andres Canela, David G. Schatz, Ferenc Livak, and André Nussenzweig**

Figure S1

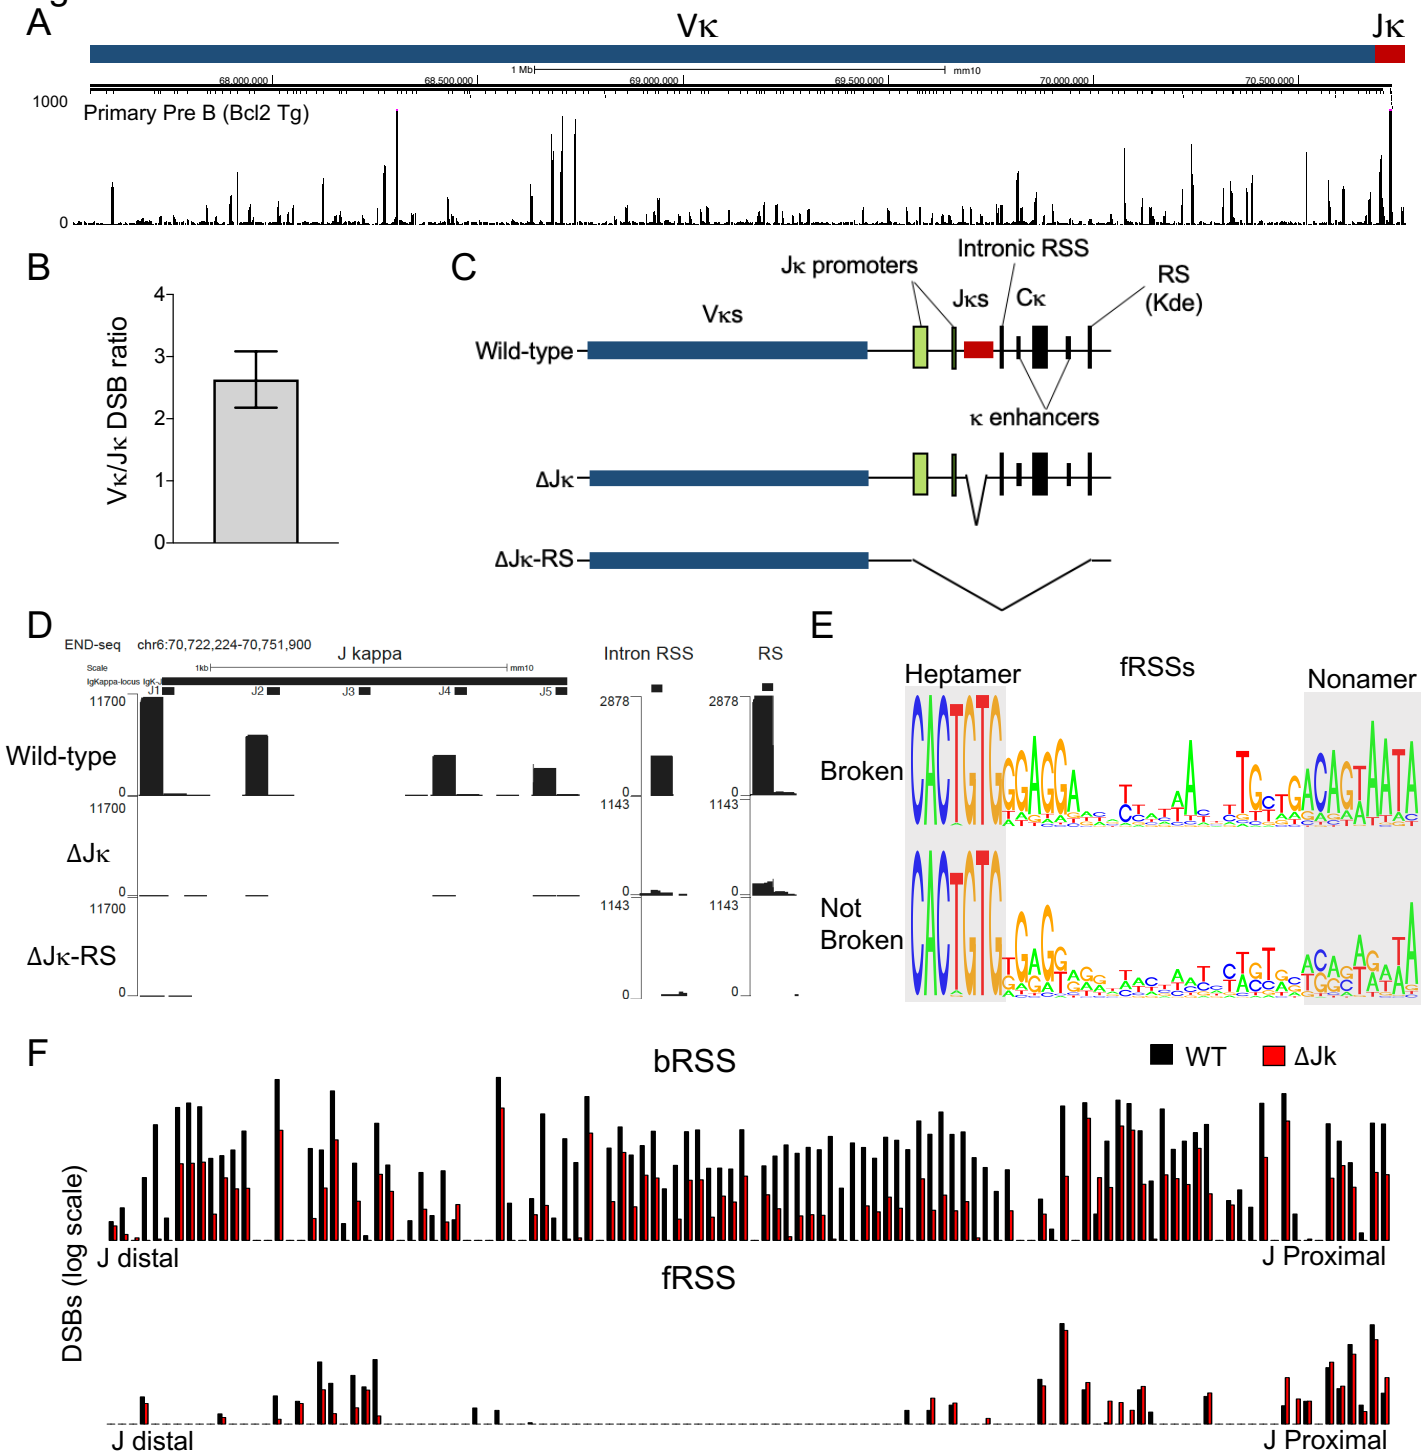

**Figure S1.  $V\kappa$  DSBs occur independently of  $J\kappa$  or the  $J\kappa$ -associated recombination center. Related to Figure 1**

(A) END-seq reads at the  $Ig\kappa$  locus from *ex vivo* cultured VavP-Bcl2-transgenic, primary mouse bone marrow pre-B cells. (B) Ratio of total DSB frequency in the  $V\kappa$  region compared to  $J\kappa$  region detected by END-seq in v-Abl cells. Error bar represent standard error of seven independent experiments. (C) Schematic diagram of the genomic organization of the  $Ig\kappa$  locus in WT (top row),  $\Delta J\kappa$  (middle row) and  $\Delta J\kappa$ -RS (bottom row) genotypes. (D) END-seq tracks around the  $J\kappa$ -RS regions from WT (top row),  $\Delta J\kappa$  (middle row) and  $\Delta J\kappa$ -RS (bottom row) v-Abl-transformed pre-B cells. (E) Consensus sequence logo at the broken (top) and non broken (bottom) fRSSs of  $V\kappa$  region, as detected by END-seq in WT v-Abl-transformed pre-B cells. Heptamer and nonamer sequences are highlighted in grey. (F) DSB levels of individual  $V\kappa$  bRSS (top) and fRSS (bottom) in WT (black) and  $\Delta J\kappa$  (red) v-Abl-transformed pre-B cells, as measured by END-seq.

Figure S2

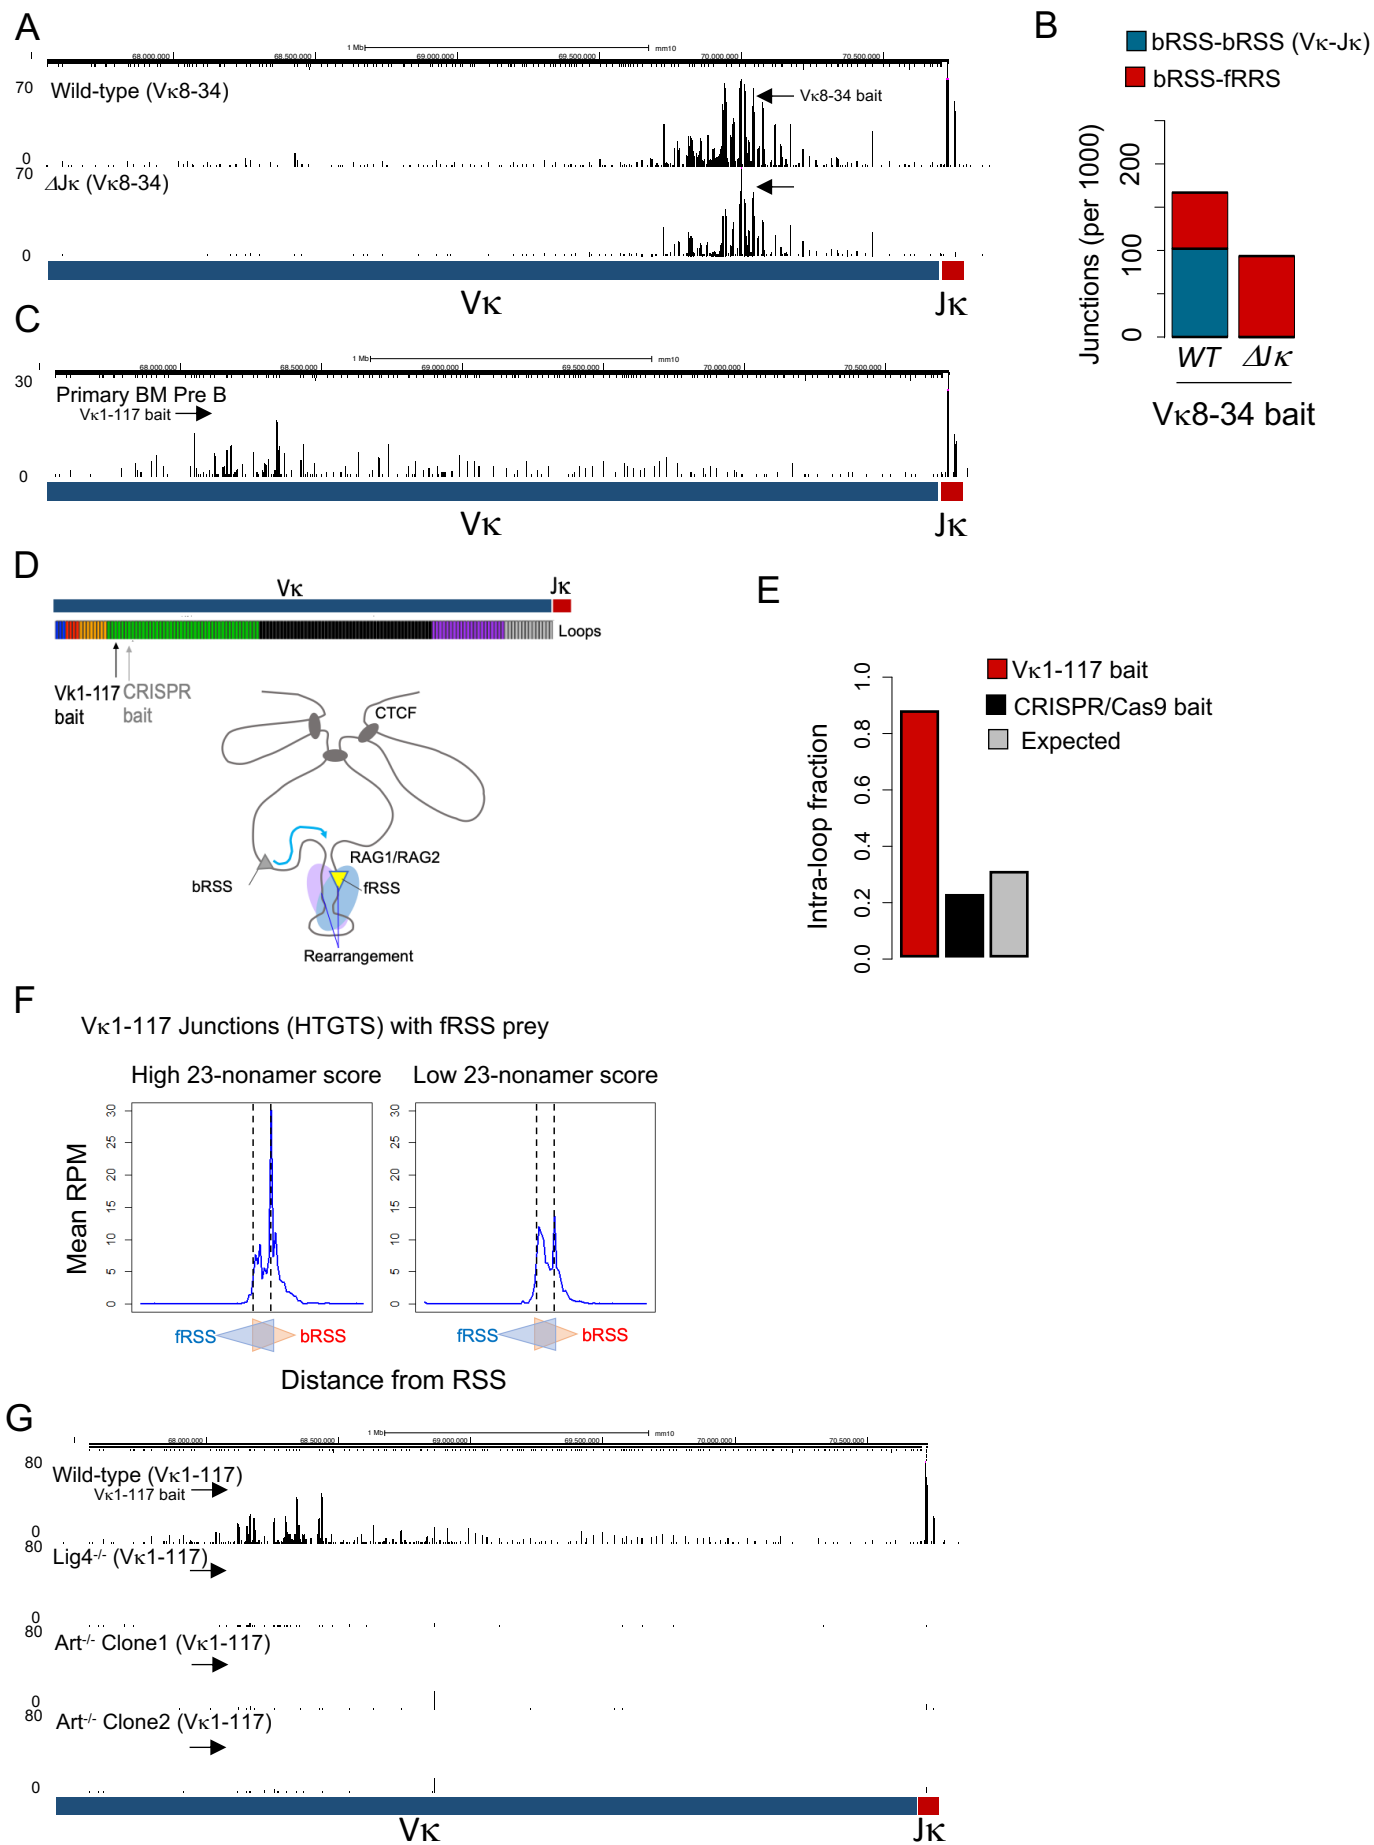

**Figure S2. Frequent fRSS mediated intra-V $\kappa$  cluster rearrangements within loop domains. Related to Figure 2.**

**(A)** HTGTS junction profiles of WT (top) and  $\Delta J\kappa$  (bottom) v-Abl-transformed pre-B cells (V $\kappa$ 8-34 bait). Arrow indicates the approximate position of the bait primer. **(B)** The number of junctions (per 1000 total junctions) of bRSS-bRSS (V $\kappa$ -J $\kappa$  in blue) and bRSS-fRSS (intra-V $\kappa$  in red) recombinations in v-Abl-transformed pre-B cells (WT and  $\Delta J\kappa$ ) detected using the V $\kappa$ 8-34 bait. **(C)** HTGTS junction profiles of WT primary, mouse bone marrow pre-B cells with V $\kappa$ 1-117 bait. Arrow indicates the approximate position of the bait primer. **(D)** Top: Schematic diagram of V $\kappa$  chromosomal loops (Karki et al., 2018). The positions of the V $\kappa$ 1-117 and CRISPR/Cas9 baits are indicated. Bottom: Cartoon representation of RAG1/2 scanning within a loop to engage fRSS and bRSS. **(E)** Fraction of junctions obtained with V $\kappa$ 1-117 (red) and CRISPR/Cas9 (black) baits that reside within the same loop as the bait (loop marked in green in panel d). Grey bar represents the expected fraction of intra-loop junctions derived from the proportion of RSS that reside within this loop. **(F)** Aggregate plot of junctions associated with the V $\kappa$ 1-117 bait in WT v-Abl-transformed pre-B. V $\kappa$  fRSS of high PWM score (left panel) and low PWM score (right panel) are shown separately. The first nucleotide of bRSS and fRSS are depicted by two overlapping triangles. The relatively high fraction of junctions at the bRSS of prey V $\kappa$  genes could be the result of secondary rearrangements, possibly hybrid joints, which disappear in the  $\Delta J\kappa$  clone (see Figure 2C). **(G)** HTGTS junction profiles from WT, *Lig4*<sup>-/-</sup>, *Artemis*<sup>-/-</sup> clone 1, and *Artemis*<sup>-/-</sup> clone 2 v-Abl-transformed pre-B cells detected with the V $\kappa$ 1-117 bait. Arrow indicates the approximate position of the V $\kappa$ 1-117 bait primer.

Figure S3

A

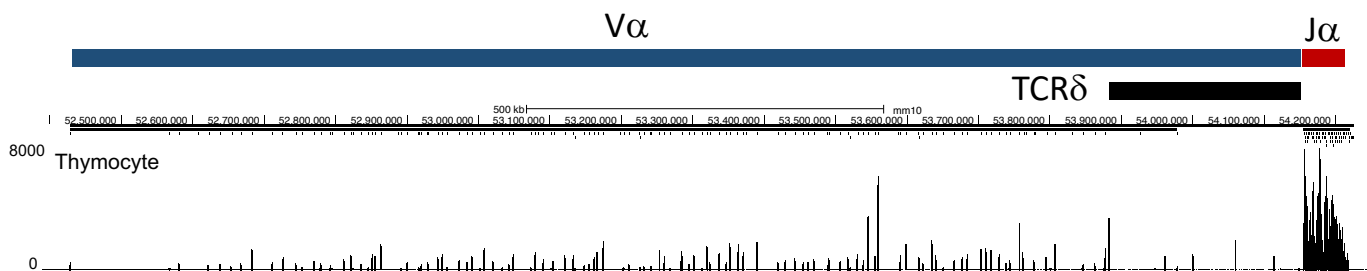

B

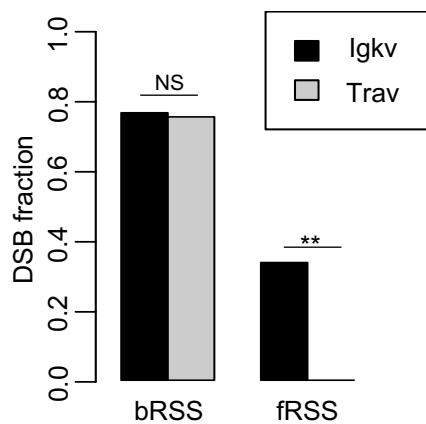

C

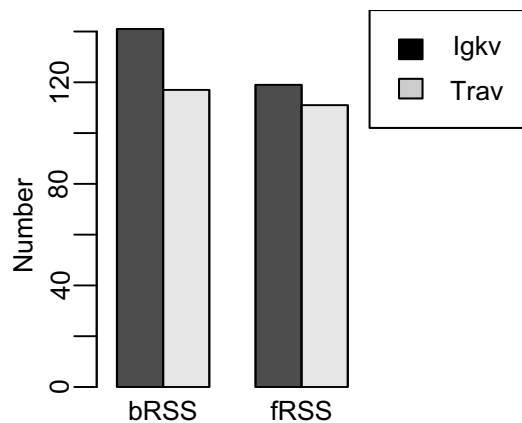

**Figure S3. Distribution of bRSS and fRSS breakage within the Ig $\kappa$  and TCR $\alpha$  loci. Related to Figure 3.** (A) END-seq tracks at the TCR $\alpha/\delta$  locus from WT DP mouse thymocytes. (B) Fraction of cleaved bRSS and cleaved potential fRSS (here defined as palindromic heptamer of an RSS) within all V $\kappa$  (black) and V $\alpha$  (grey) gene segments, as detected by END-seq. NS  $p > 0.05$ , \*\* $p < 1e^{-10}$ , fisher test. (C) There are similar number of V genes with bRSS and with potential fRSS (palindromic heptamer) in the Ig $\kappa$  (black) and TCR $\alpha$  (grey) loci.

Figure S4

A

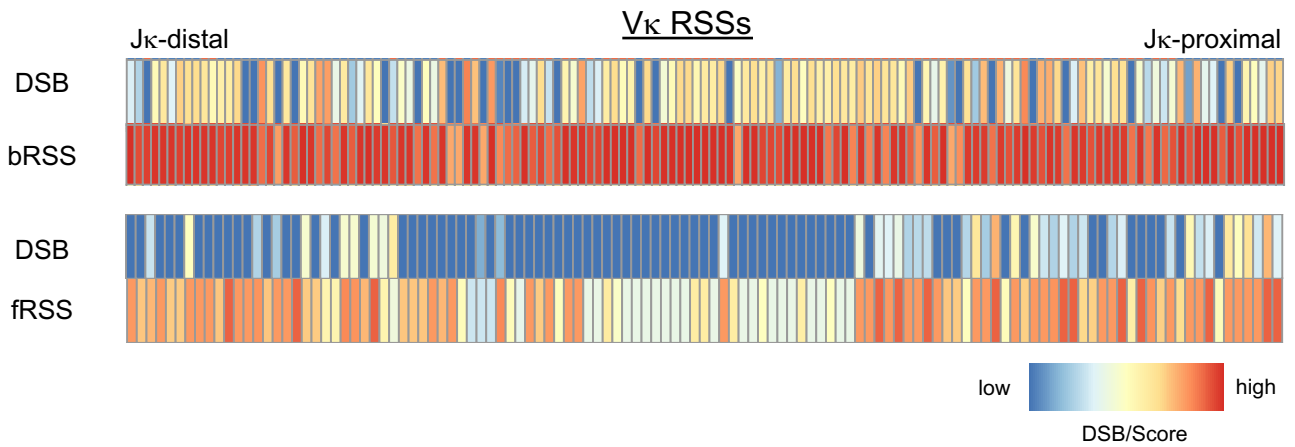

B

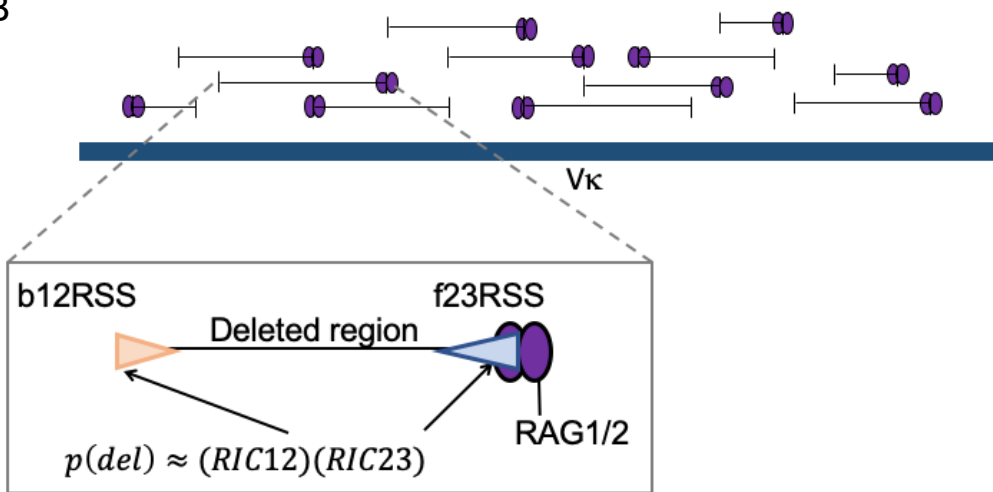

**Figure S4. DSB distribution and probability of V $\kappa$  segment deletion. Related to Figure 5.**

(A) Heatmap of DSB signal (upper) and PWM score (bottom) of 12mer bRSS or 23mer fRSS within the V $\kappa$  cluster. Each box corresponds to the RSS of a V $\kappa$  gene and the color indicates the strength of DSB signal or the PWM score of the RSS. (B) The probability of a V $\kappa$  gene segment deletion is estimated by the combined probability of (i) the functional quality of the pair of bRSS and fRSS as measured with RIC score, (ii) RAG binding to at least one of the two RSS within the pairs, and (iii) loop coefficient (see Methods for details).

Table S1

| gRNAs used to generate mutant v-Abl cell lines |                                                                 |
|------------------------------------------------|-----------------------------------------------------------------|
| ΔJk up (gRNA)                                  | AAGCATGCGTGAAGCGCTT                                             |
| ΔJk down (gRNA)                                | GGGCTCATTATCAGTTGACG                                            |
| ΔJk-RS up (gRNA)                               | ATCACACGTATAGAGTAAGC                                            |
| ΔJk-RS down (gRNA)                             | CCTGCCACACGACTCCTTC                                             |
| Primers used for screening of gene deletion    |                                                                 |
| ΔJk-Fw                                         | ACTAACTGCTGAGCCACCTC                                            |
| ΔJk-Rv                                         | GCAGTCAGACCCAGATCTCAA                                           |
| ΔJk-intact-Rv                                  | AGCCACAGACATAGACAACGG                                           |
| ΔJk-RS-Fw                                      | ACCTGGGGAACAAAACCTGGA                                           |
| ΔJk-RS-Rv                                      | AATCTGCCTGTCTGAAGCCC                                            |
| ΔJk-RS-intact-Rv                               | GGAAGACAAAGGAGGCCACG                                            |
| sgRNA targeted to downstream of Vk1-117        |                                                                 |
| Vk1-117 CRISPR-Cas9                            | TTGCTACATATCTGGCACCG                                            |
| Primers and adaptors used for HTGTS            |                                                                 |
| Adaptor-upper                                  | GGTACACGACGCTCTCCGATCTNNNNNN/3AmMO/                             |
| Adaptor-lower                                  | /5Phos/AGATCGGAAGAGCGTCGTGTACC/3AmMO/                           |
| I5-bridge                                      | AATGATACGCGCACCACCGAGATCTACTCTTTCCCTACACGACGCTCTTCCGATC*T       |
| P5-I5c                                         | AATGATACGCGCACCACCGAGATCTACTCTTT*C                              |
| P7-I7c                                         | CAAGCAGAAGACGGCATAACGAGATCGGTCTCGGCATTCTGCTGAACCGCTCTT*C        |
| Jk1-bio                                        | /5Biosg/TTCCAGCTTTGCTTACGGAG                                    |
| I7-Jk1-nested-barcode1                         | CTCGGCATTCTGCTGAACCGCTCTCCGATCTATTACTCGAGTGCCAGAATCTGGTTTCAGAG  |
| Vk1-117-bio                                    | /5Biosg/CAGAAAGCCTCAGTATGCACCA                                  |
| I7-Vk1-117-nested-barcode1                     | CTCGGCATTCTGCTGAACCGCTCTCCGATCTATTACTCGCAGGGACAGATTTCACACTCAAG  |
| I7-Vk1-117-nested-barcode2                     | CTCGGCATTCTGCTGAACCGCTCTCCGATCTTCCGGAGACAGGGACAGATTTCACACTCAAG  |
| I7-Vk1-117-nested-barcode3                     | CTCGGCATTCTGCTGAACCGCTCTCCGATCTCGCTCATTACAGGGACAGATTTCACACTCAAG |
| I7-Vk1-117-nested-barcode4                     | CTCGGCATTCTGCTGAACCGCTCTCCGATCTGAGATTTCCAGGGACAGATTTCACACTCAAG  |
| Vk8-34-bio                                     | /5Biosg/CAGAAACCAGGACGATCTCCT                                   |
| I7-Vk8-34-nested-barcode7                      | CTCGGCATTCTGCTGAACCGCTCTCCGATCTCTGAAGCTACTAGGGTATCTGGAGTCCCTG   |
| I7-Vk8-34-nested-barcode8                      | CTCGGCATTCTGCTGAACCGCTCTCCGATCTTAAATGCGCACTAGGGTATCTGGAGTCCCTG  |
| Bio-Vk1-117-CRISPR                             | /5Biosg/TATGAACAGGTGCCCTCCA                                     |
| I7-Vk1-117-CRISPR-barcode10                    | CTCGGCATTCTGCTGAACCGCTCTCCGATCTTCCGCAACCTCTCCGACCCACTACTG       |
| bio-human-IGJK1                                | /5Biosg/TCCCCAGGACATTTCTGAAG                                    |
| I7-human-IGJK1-barcode1                        | CTCGGCATTCTGCTGAACCGCTCTCCGATCTATTACTCGGGCTGATTGCAGAGTCACT      |
| bio-human-IGVK2-28                             | /5Biosg/TAACTTTGCAATTCATTATTTAGGA                               |
| I7-human-IGVK2-28-barcode4                     | CTCGGCATTCTGCTGAACCGCTCTCCGATCTGAGATCTGGATACAACATTTGGATTGG      |
| bio-human-IGVK3-20                             | /5Biosg/GCACCCCTGTCTTTGTCTCCA                                   |
| I7-human-IGVK3-20-barcode7                     | CTCGGCATTCTGCTGAACCGCTCTCCGATCTCTGAAGCTATCAGCAGACTGGAGCCTGAA    |

\*Phosphorothioate bonds, /5Biosg/: 5' Biotin, /3AmMO/: 3' Amino modifier

Table S1. List of Oligos. Related to STAR Methods.
